# Supplementary material for: Bacillus subtilis CBR05 induces Vitamin B6 biosynthesis in tomato through the de novo pathway in contributing disease resistance against Xanthomonas campestris pv. vesicatoria
Source: PubMed Central journal article supplement (PMC6482200; doi:10.1038/s41598-019-41888-6), 2019-04-24
Supplement: 41598_2019_41888_MOESM1_ESM.pdf [file 41598_2019_41888_MOESM1_ESM.pdf]

***Bacillus subtilis* CBR05 induces Vitamin B6 biosynthesis in tomato through the *de novo* pathway in contributing disease resistance against *Xanthomonas campestris* pv. *vesicatoria***

**Running Head:** *B. subtilis* induced expression of VitB6 biosynthetic genes

**Murugesan Chandrasekaran<sup>1</sup>, Manivannan Paramasivan<sup>2</sup>, and Se-Chul Chun<sup>3\*</sup>**

<sup>1</sup>Department of Food Science and Biotechnology, Sejong University, 209 Neungdong-ro, Gwangjin-gu, Seoul 05006, Republic of Korea. Email address: [chandrubdubio@gmail.com](mailto:chandrubdubio@gmail.com)

<sup>2</sup>Department of Microbiology, Bharathidasan University, Tiruchirappalli 620024, Tamilnadu, India. Email address: [manivannan3065@gmail.com](mailto:manivannan3065@gmail.com)

<sup>3</sup>Department of Environmental Health Science, Konkuk University, 120 Neungdong-ro, Gwangjin-gu, Seoul 05029, Republic of Korea. Email address: [scchun@konkuk.ac.kr](mailto:scchun@konkuk.ac.kr)

*\*Corresponding author*

Se-Chul Chun,

Department of Environmental Health Science,

Konkuk University, Seoul, Republic of Korea.

Phone: +82-2-450-3727

Fax: +82-2-450-3726

E-mail: [scchun@konkuk.ac.kr](mailto:scchun@konkuk.ac.kr)

**Table S1.** Antioxidant enzyme activities

| Treatment            | Enzyme activities |                                            |                                            |                                            |                                            |
|----------------------|-------------------|--------------------------------------------|--------------------------------------------|--------------------------------------------|--------------------------------------------|
|                      | Time              | SOD<br>(Units mg <sup>-1</sup><br>protein) | CAT<br>(Units mg <sup>-1</sup><br>protein) | PPO<br>(Units mg <sup>-1</sup><br>protein) | POD<br>(Units mg <sup>-1</sup><br>protein) |
| Mock                 | 0 h               | 1.51 ± 0.03 <sup>g</sup>                   | 2802.26 ± 0.54 <sup>i</sup>                | 1.98 ± 0.21 <sup>g</sup>                   | 1.65 ± 0.01 <sup>j</sup>                   |
|                      | 24 h              | 3.58 ± 0.02 <sup>f</sup>                   | 5261.97 ± 0.65 <sup>h</sup>                | 7.60 ± 0.02 <sup>e</sup>                   | 2.71 ± 0.03 <sup>i</sup>                   |
|                      | 48 h              | 4.20 ± 0.06 <sup>e</sup>                   | 6224.27 ± 1.30 <sup>g</sup>                | 6.38 ± 0.09 <sup>f</sup>                   | 4.58 ± 0.01 <sup>g</sup>                   |
|                      | 72 h              | 3.75 ± 0.02 <sup>f</sup>                   | 7217.17 ± 1.24 <sup>f</sup>                | 7.91 ± 0.05 <sup>e</sup>                   | 6.24 ± 0.01 <sup>f</sup>                   |
| XCV                  | 0 h               | 1.50 ± 0.03 <sup>g</sup>                   | 2274.16 ± 0.83 <sup>j</sup>                | 1.32 ± 0.01 <sup>gh</sup>                  | 0.86 ± 0.01 <sup>jk</sup>                  |
|                      | 24 h              | 3.65 ± 0.06 <sup>f</sup>                   | 7524.70 ± 0.59 <sup>f</sup>                | 8.65 ± 0.05 <sup>d</sup>                   | 3.78 ± 0.05 <sup>h</sup>                   |
|                      | 48 h              | 7.25 ± 0.04 <sup>ab</sup>                  | 10540.97 ± 0.93 <sup>de</sup>              | 13.56 ± 0.03 <sup>b</sup>                  | 8.14 ± 0.03 <sup>d</sup>                   |
|                      | 72 h              | 4.02 ± 0.01 <sup>cf</sup>                  | 11067.58 ± 0.70 <sup>c</sup>               | 8.94 ± 0.01 <sup>d</sup>                   | 6.26 ± 0.01 <sup>f</sup>                   |
| XCV+CBR05            | 0 h               | 1.75 ± 0.01 <sup>g</sup>                   | 2861.01 ± 0.24 <sup>i</sup>                | 1.71 ± 0.01 <sup>g</sup>                   | 1.51 ± 0.01 <sup>jk</sup>                  |
|                      | 24 h              | 7.71 ± 0.04 <sup>a</sup>                   | 10893.04 ± 0.93 <sup>d</sup>               | 12.94 ± 0.04 <sup>bc</sup>                 | 11.44 ± 0.04 <sup>a</sup>                  |
|                      | 48 h              | 7.35 ± 0.01 <sup>ab</sup>                  | 11179.15 ± 0.29 <sup>b</sup>               | 14.07 ± 0.05 <sup>b</sup>                  | 10.55 ± 0.01 <sup>b</sup>                  |
|                      | 72 h              | 4.55 ± 0.01 <sup>e</sup>                   | 11347.46 ± 0.57 <sup>a</sup>               | 10.53 ± 0.02 <sup>c</sup>                  | 8.93 ± 0.02 <sup>c</sup>                   |
| XCV+Pyridoxine       | 0 h               | 1.45 ± 0.02 <sup>g</sup>                   | 2870.85 ± 0.39 <sup>i</sup>                | 1.41 ± 0.05 <sup>gh</sup>                  | 1.43 ± 0.05 <sup>jk</sup>                  |
|                      | 24 h              | 5.62 ± 0.03 <sup>d</sup>                   | 10091.23 ± 0.37 <sup>d</sup>               | 10.62 ± 0.08 <sup>c</sup>                  | 8.62 ± 0.02 <sup>cd</sup>                  |
|                      | 48 h              | 5.27 ± 0.03 <sup>d</sup>                   | 8218.03 ± 0.16 <sup>f</sup>                | 8.21 ± 0.06 <sup>de</sup>                  | 7.21 ± 0.01 <sup>e</sup>                   |
|                      | 72 h              | 4.52 ± 0.02 <sup>e</sup>                   | 6225.07 ± 0.41 <sup>g</sup>                | 5.54 ± 0.06 <sup>f</sup>                   | 5.52 ± 0.04 <sup>fg</sup>                  |
| XCV+Pyridoxine+CBR05 | 0 h               | 1.52 ± 0.02 <sup>g</sup>                   | 2850.21 ± 0.62 <sup>i</sup>                | 1.51 ± 0.02 <sup>g</sup>                   | 1.52 ± 0.01 <sup>jk</sup>                  |
|                      | 24 h              | 6.53 ± 0.03 <sup>c</sup>                   | 1008.32 ± 0.43 <sup>de</sup>               | 10.93 ± 0.03 <sup>c</sup>                  | 10.32 ± 0.00 <sup>b</sup>                  |
|                      | 48 h              | 5.80 ± 0.01 <sup>d</sup>                   | 9001.20 ± 0.79 <sup>e</sup>                | 16.32 ± 0.00 <sup>a</sup>                  | 10.25 ± 0.01 <sup>b</sup>                  |
|                      | 72 h              | 3.61 ± 0.04 <sup>f</sup>                   | 7254.02 ± 0.32 <sup>f</sup>                | 9.63 ± 0.02 <sup>d</sup>                   | 6.12 ± 0.02 <sup>f</sup>                   |

Mean ± SD of three replicates within a column followed by the different letters indicate a significant difference at  $P \leq 0.05$ .

**Table S2.** List of primers used in the study

| <b>Gene name</b> | <b>Host plants</b>     | <b>Primer name</b> | <b>Primer sequence (5' 3') →</b> |
|------------------|------------------------|--------------------|----------------------------------|
| <i>Actin</i>     | <i>S. lycopersicum</i> | <i>Actin-F</i>     | AGG CAC ACA GGT GTT ATG GT       |
|                  |                        | <i>Actin-R</i>     | AGC AAC TCG AAG CTC ATT GT       |
| <i>PDX1.2</i>    | <i>S. lycopersicum</i> | <i>PDX1.2-F</i>    | GAT GCA GCT GGG TTG TGA TG       |
|                  |                        | <i>PDX1.2-R</i>    | TCC AAA CCA CTG CTA GCC GC       |
| <i>PDX1.3</i>    | <i>S. lycopersicum</i> | <i>PDX1.3-F</i>    | CAT GTG CGT TCC GTT ATG GG       |
|                  |                        | <i>PDX1.3-R</i>    | TGA ACC ACA GGG AGC CTA CC       |
| <i>PDX2</i>      | <i>S. lycopersicum</i> | <i>PDX2-F</i>      | CAA AGC TTC GGA ACG CGT TCA A    |
|                  |                        | <i>PDX2-R</i>      | GTC AAT GAG TAG CCA TTT GAC C    |
| <i>SOS4</i>      | <i>S. lycopersicum</i> | <i>SOS4-F</i>      | GCG TAT TTC ACG GGA ACT GG       |
|                  |                        | <i>SOS4-R</i>      | CTT GAG ACA GCA AGC TCT GC       |
